# Supplementary material
Source: Springer Nature journal article supplement (https://www.springermedizin.de/resource/supplementary/12916_2011_391_MOESM2_ESM.pdf/9599874)
Supplement: MOESM2 [file 9599874]

# MSC Clinical Trials by Phase (n= 107)

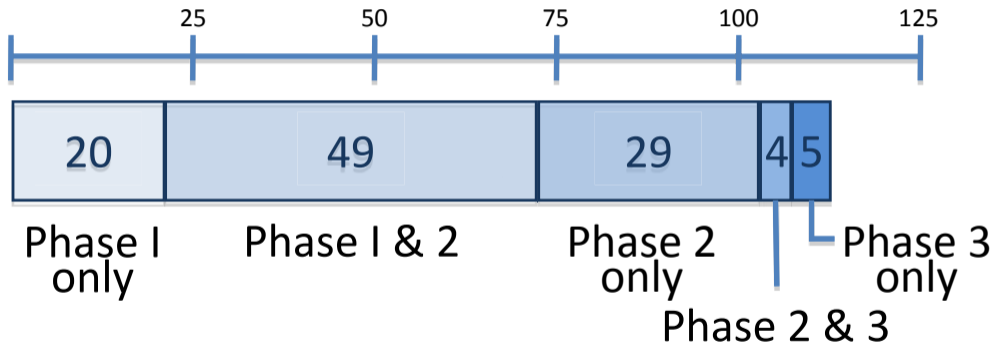

CIRM summary / source [clinicaltrials.gov](http://clinicaltrials.gov) (accessed 2/8/2011)
